1  
2  
3  
4  
5  
6  
7  
8  
9  
10  
11  
12  
13  
14  
15  
16  
17  
18  
19  
20  
21  
22  
23  
24  
25  
26  
27  
28

## Is phylogenetic diversity a surrogate for functional diversity across clades and space?

Florent Mazel<sup>1,2,3,\*</sup>, Matthew W. Pennell<sup>3,4</sup>, Marc Cadotte<sup>5,6,§</sup>, Sandra Diaz<sup>7,§</sup>, Giulio Valentino Dalla Riva<sup>8,§</sup>, Richard Grenyer<sup>9,§</sup>, Fabien Leprieur<sup>10</sup>, Arne O. Mooers<sup>1,§</sup>, David Mouillot<sup>10,11,§</sup>, Caroline M. Tucker<sup>12,§</sup>, and William D. Pearse<sup>13</sup>

- <sup>1</sup> Department of Biological Sciences, Simon Fraser University, Burnaby, BC, Canada  
<sup>2</sup> Department of Botany, University of British Columbia, Vancouver, BC V6T 1Z4, Canada;  
<sup>3</sup> Biodiversity Research Centre, University of British Columbia, Vancouver, BC V6T 1Z4, Canada;  
<sup>4</sup> Department of Zoology, University of British Columbia, Vancouver, BC V6T 1Z4, Canada;  
<sup>5</sup> Biological Sciences, University of Toronto-Scarborough, Scarborough M1C 1A4, Canada  
<sup>6</sup> Ecology and Evolutionary Biology, University of Toronto, Toronto, ON, Canada  
<sup>7</sup> Instituto Multidisciplinario de Biología Vegetal. FECyN - Universidad Nacional de Córdoba. Casilla de Correo 495, 5000 Córdoba. Argentina  
<sup>8</sup> Department of Statistics, University of British Columbia, Vancouver, BC V6T 1Z4, Canada;  
<sup>9</sup> School of Geography and the Environment, University of Oxford, Oxford OX1 3QY, U.K.  
<sup>10</sup> Marine Biodiversity, Exploitation, and Conservation (MARBEC), UMR 9190, Université Montpellier, Montpellier, France  
<sup>11</sup> Australian Research Council Centre of Excellence for Coral Reef Studies, James Cook University, Townsville, QLD, Australia  
<sup>12</sup> Department of Biology, University of North Carolina-Chapel Hill  
<sup>13</sup> Ecology Center and Department of Biology, Utah State University, Logan, Utah  
\* Corresponding Author; flo.mazel@gmail.com  
§ Authors listed alphabetically

Keywords: conservation, EDGE, evolutionary distinct, trait diversity, evolutionary diversity

29 **Abstract**

30 In the face of limited funding and widespread threats to biodiversity, conserving the widest  
31 possible variety of biological traits (functional diversity, FD) is a reasonable prioritization  
32 objective. Because species traits are often similar among closely related species (phylogenetic  
33 signal), many researchers have advocated for a “phylogenetic gambit”: maximizing  
34 phylogenetic diversity (PD) should indirectly capture FD. To our knowledge, this gambit has not  
35 been subject to a focused empirical test. Here we use data from >15,000 vertebrate species to  
36 empirically test it. We delineate >10,000 species pools and test whether prioritizing the most  
37 phylogenetically diverse set of species results in more or less FD relative to a random choice.  
38 We find that, across species pools, maximizing PD results in an average gain of 18% of FD  
39 relative to a random choice, suggesting that PD is a sound conservation prioritization strategy.  
40 However, this averaged gain hides important variability: for 10% of the species pools,  
41 maximizing PD can capture less FD than an averaged random scheme because of recent trait  
42 divergence and/or very strong trait conservatism. In addition, within a species pool, many  
43 random sets of species actually yield more FD than the PD-maximized selection – on average  
44 36% of the time per pool. If the traits we used are representative of traits we wish to conserve,  
45 our results suggest that conservation initiatives focusing on PD will, on average, capture more  
46 FD than a random strategy, but this gain will not systematically yield more FD than random and  
47 thus can be considered risky.

48

49  
50  
51 We are in the midst of a period of heightened biological extinction, with rates several orders of  
52 magnitude higher than background rates estimated from the fossil record [1–3]. In addition to  
53 having potentially widespread consequences for the functioning of ecosystems and the  
54 provisioning of valuable ecosystem services, this situation poses a huge moral challenge [4–8].  
55 And, to the extent that resources for conservation actions remain limited, agonizing choices as  
56 to which species most warrant attention become necessary [9,10]. To keep humanity’s options  
57 open, and our common legacy as rich as possible, it is widely argued that we should seek to  
58 maximize the biological diversity of forms and functions [6–12] . The biological diversity of  
59 forms and functions can be measured as functional diversity [FD] (see methods). However, in  
60 practice, it is challenging to prioritize species on the basis of FD: we have imperfect knowledge  
61 about which, and how many traits and functions are important in a given context, how these  
62 traits and functions vary among species and across space, and how the importance of traits may  
63 change in the future [13]. Many researchers have therefore advocated for a “phylogenetic  
64 gambit”; that is, if species traits reflect their shared evolutionary history, then the pattern of  
65 that evolutionary history –their phylogeny– should serve as a useful stand-in for unmeasured  
66 and unmeasurable traits [9,14,15]. The phylogenetic gambit implies that maximizing  
67 phylogenetic diversity (PD), i.e. the breadth of evolutionary history, will ensure that a wide  
68 variety of forms and functions are present within a species set [14–17].  
69 Following this logic, PD has formed the basis of global conservation schemes, notably the EDGE  
70 program [18], has been used by restoration biologists [19], and has been widely embraced by  
71 researchers across the biodiversity sciences [20–23]. Despite this enthusiasm, the critical

72 question of whether maximizing PD will actually capture more FD than prioritization schemes  
73 that ignore phylogeny has, to our knowledge, never been empirically tested [16]. While it may  
74 seem obvious that sampling species across the tree of life will capture high amounts of FD, a  
75 recent theoretical study demonstrated that PD could be a poor surrogate for FD and, in some  
76 scenarios, prioritizing species on the basis of PD could actually lead to capture *less* FD than if  
77 species were simply selected at random [16].

78 We clarify what our goals are in testing the utility of PD to capture FD. First, we take as given  
79 that maximizing PD is not the overarching goal *per se* of PD-maximization schemes, but rather  
80 that a PD maximization strategy is valued for its ability to capture more FD compared to a  
81 strategy that ignores phylogeny. Second, asking whether PD maximization captures more FD  
82 than a random choice is fundamentally distinct (and a lower bar) from asking whether  
83 maximizing PD also *maximizes* FD [e.g. 15,19–21,23,24]. Finally, it is important to note that we  
84 are selecting *species* sets to maximize PD or FD within a region. While this is a simplification, as  
85 conservation actions often aim to select sets of *areas* (e.g. in reserve design), the only global  
86 phylogenetically-informed conservation initiative is species-centered (EDGE; Isaac et al. 2007).  
87 More fundamentally, the framework we use here allows us to directly test the fundamental  
88 phylogenetic gambit at the heart of all PD-based conservation [16]. Critically, the question we  
89 raise has been shown to be distinct from asking whether traits have phylogenetic signal  
90 (whether closely related species tend to share similar sets of traits), since PD can be a poor  
91 surrogate for FD *even if* traits exhibit phylogenetic signal [16].

92 This points to the need for empirical tests of whether —within a given species pool— sets of  
93 species selected to maximize PD actually contain more FD than sets of species selected without  
94 regard to evolutionary relatedness. We evaluate the PD~FD relationship for different species  
95 pools (taxonomic families and geographical assemblages, *i.e.*, sets of species co-occurring at a  
96 given scale) using a large global dataset including trait, phylogenetic, and geographic range data  
97 for 4,616 species of mammals, 9,993 species of birds, and 1,5036 species of tropical fish.  
98 Specifically, we measure FD as functional richness (see methods) and compute, for any given  
99 species pool, an estimate of surrogacy ( $S_{PD\_FD}$ , [26,27], Figure 1).  $S_{PD\_FD}$  represents the amount  
100 of FD sampled by the set of species chosen to maximize PD, relative to the FD sampled by  
101 optimal set of species selected to maximize FD directly, with both components controlled for  
102 the expected FD from a random species set of the same size.  $S_{PD\_FD}$  will be positive if the  
103 averaged PD-maximized set contains more FD than the averaged random set, and negative if  
104 not.  $S_{PD\_FD}$  will equal 100% if the PD-maximization strategy is optimal (*i.e.* to maximize FD). We  
105 integrate  $S_{PD\_FD}$  for each species pool across all deciles of species richness (Eqn. 1) but because  
106 they are many sets of species that can maximize PD or than can be chosen at random, we  
107 computed  $S_{PD\_FD}$  based on the averaged FD over 1000 PD-maximized sets and 1000 random sets  
108 [16].

109 We find that selecting the most phylogenetically diverse sets of species within a given  
110 taxonomic family or within a given geographical location (large grid-cells across the globe)  
111 captures, on average, 18% more FD than that of randomly chosen species (*i.e.*  $S_{PD\_FD} = 18\%$ , SD  
112 +/- 6.5% across pools, see Figure 1). Although the surrogacy is generally positive, there was  
113 variation across species pools. For example, the surrogacy of PD varies widely from a minimum

114 of -85% to a maximum of 92%, meaning that selecting the most phylogenetically diverse sets of  
115 taxa can capture either 85% less (or 92% more) FD than that of randomly chosen taxa (Fig. 2-3  
116 and Fig. S1-2). However, in 88% of the species pools, choosing sets of species according to PD  
117 captured more FD than would be expected at random (*i.e.*, surrogacy values  $> 0$  in 88% of the  
118 cases, see Fig. 2-3). This suggest that, on average, maximizing PD is a sound strategy to capture  
119 FD.

120           However, even if in the majority cases maximizing PD does, on average, better than an  
121 averaged random selection, this does not capture the *reliability* of its performance. The PD-  
122 maximization and the random selection strategies exhibit variation: simply by chance, random  
123 selection of species can capture very high (or, conversely, very low) FD, and the same may be  
124 true (to a previously unstudied degree) for PD. The extent of this variation is important: if it is  
125 less than the average difference, PD-maximization is a reliable strategy as it will always yield  
126 more FD, but if it does not, then PD-maximization could be unreliable for individual  
127 conservation interventions. To contrast these two situations, we measured the fraction of times  
128 that, within each species pool, the PD-maximization strategy yielded more FD than random  
129 selection (see methods). PD-based selection was the best choice in 64% of cases (SD across  
130 species pool=9%, see Supplementary Table 1 and Fig. S3), making it the better strategy but not  
131 a perfectly reliable one. Thus, while the PD-maximization strategy has a consistent positive  
132 effect (*i.e.* the average PD-maximization strategy yields more FD than the average random  
133 strategy), its effect is weak (*i.e.* the PD-maximization strategy still yields less FD than the  
134 random strategy in 36% of the trials within a species pool).

135           We next explored the drivers of surrogacies values across species pools. Surrogacy of PD  
136 appears to weaken as the species pool richness increases (on average, Spearman Rho between  
137 absolute surrogacies and species richness = -.15), most clearly seen in the tropics and in  
138 species-rich families such as the Muridae (rats mice and allies) and Columbidae (pigeons and  
139 allies) (Fig. 2-3). This is likely because our measure of FD (see Methods) rapidly saturates as the  
140 number of selected species increases and species from these large pools harbor high functional  
141 redundancy, such that a random prioritization scheme performs relatively well, or at least no  
142 worse than other strategies (Fig. S4). In contrast, FD can be greatly increased by prioritization of  
143 species using PD from species poor assemblages or clades [see also 28]. This is particularly the  
144 case in spatial assemblages containing multiple taxonomic orders, which are both  
145 phylogenetically and ecologically divergent from one another. Interestingly, the PD-FD  
146 relationship was not consistent across *taxonomic* scale: we found that, in contrast to patterns  
147 at the family level, for certain mammalian and avian orders (which are older than the families  
148 described above), using PD to select species is much worse for capturing FD than choosing  
149 species at random (see, for example, the Afrosoricidae, Chiroptera, and Charadriiformes in Fig.  
150 S5).

151           We explored whether it is possible to explain this variability within- and between-  
152 datasets, and in particular, why for some assemblages/clades, a PD-prioritization strategy fails  
153 to capture more FD than random choice. It is often implicitly assumed that phylogenetic signal  
154 (i.e. the degree to which closely related species tend to harbor similar sets of traits) can be used  
155 to evaluate the effectiveness of PD as a surrogate for FD [5,15–17]. Surprisingly perhaps, the  
156 value of PD as a surrogate for FD was only weakly correlated with the phylogenetic signal of the

157 underlying traits (Fig. S6-7, on average Spearman  $Rho = 0.17$ ). Similarly, tree imbalance, which  
158 is known to affect surrogacy in simulations [16], did not explain surrogacy in these empirical  
159 data (Fig. S6-7).

160 For mammals, regions where PD did worse than random were located in the Sahara,  
161 south western Patagonia, southern Africa including parts of Madagascar, and New Guinea  
162 (Figure 2). These latter two in particular are of concern, since they are global conservation  
163 priorities on account of species endemism and habitat loss. We suggest two historical reasons  
164 for such idiosyncratic poor performance of PD. First, there is a tendency for a large carnivore  
165 species, either a top predator (*e.g.*, cheetahs in the Sahara or foxes in Patagonia) or a large  
166 scavenger (*e.g.*, the hyena in South Africa) to co-occur with a close relative with distinct traits in  
167 these areas (*e.g.*, a desert cat with the cheetah or the aardwolf with the hyena, see Fig. S8).  
168 Only one of these closely-related species will tend to be selected under prioritization schemes  
169 that maximize PD, thus reducing the volume of the convex hull on average when the  
170 functionally distinct one is not selected (the large predator or scavenger). This seems also to  
171 drive the low surrogacy of PD in Charadriiformes (especially *Larus* and *Sterna*; see Figure S8).  
172 Second, lineages in which traits evolve very slowly will contribute little to FD, even over long  
173 periods of time (branch lengths) that contribute greatly to PD. For example, in New Guinea  
174 many co-occurring bats with similar traits diverged long ago, such that they are always selected  
175 in the PD maximizing set, but do not add much to the convex hull, resulting in a poor surrogacy  
176 of PD for FD. Such strong ecological niche conservatism is common in mammals [29], *e.g.* in the  
177 Geomyidae: two basal branches of the Geomyidae tree harbor very similar traits (species  
178 descending from these branches are actually grouped in the same genus *Thomomys*) while



179 being distantly related in the phylogenies we used (Fig. S8). As such, they will be selected in all  
180 PD maximizing sets, but will not contribute greatly to FD.

181 In summary, while in specific cases maximizing PD actually captures less FD than a  
182 random set, in the majority of cases PD performs well (at least, better than random) as a  
183 surrogate (in 88% of the species pool sets the mean surrogacy value  $\geq 0$ ). This represents an  
184 important and necessary test of the motivations of conservation planning activities that  
185 incorporate PD. However, we simplistically and implicitly assume that chosen species will either  
186 be saved or will go extinct and we have not linked our various scenarios to any particular policy  
187 position or conservation objective other than maximizing FD within a phylogenetic clade or  
188 region [16]. In reality, conservation decisions reflect the interplay of social, economic, political,  
189 and scientific priorities, and do not necessarily result in the saving of target species (and  
190 therefore of their associated FD or PD). However, our approach allows us to test a long-  
191 standing idea in biodiversity science, and identify two critical ways in which PD-based  
192 conservation can become disconnected from FD. We have not made any assumptions regarding  
193 the macroevolutionary history of these traits (for example, assuming some particular model of  
194 trait evolution) or how phenotypes are distributed across geographical and ecological gradients,  
195 and therefore hope that our results generalize beyond the species we study here.

196 The spatial scale of our analysis reflects the scale of available data appropriate for  
197 making a general statement about the surrogacy value of PD for FD. The scale of conservation  
198 activities can vary, from the global scale of the hotspots approach to local protected areas  
199 within a single country. Unfortunately, the connection between these scales remains unclear.

200 For example, if the motivation for protecting FD is to maintain community-driven ecosystem  
201 functions and services [5,6,30], the value of a regional or global scale focus may be  
202 questionable [31]. This worry has motivated studies that focus on local scales [6]. This is an  
203 important area for further research; the patterns linking PD and FD in the regional pool may still  
204 be important, since this is the species pool from which local sites are assembled and  
205 maintained.

206 The motivator of our test of the surrogacy value of PD for FD is the fact that ecologically-  
207 relevant trait data is in short supply, especially for rare and data-deficient species. Indeed, if it  
208 were not for this relative paucity of data, we could simply prioritize species based on their  
209 unique contribution to FD directly [e.g. 36]. Although there have been massive and well-funded  
210 efforts to collect and curate trait data from across the Tree of Life [33–35], we are still far from  
211 having comprehensive coverage. Furthermore, despite recent progress [e.g. 34,35], it is still not  
212 fully understood which traits are most relevant for responses to environmental change, or that  
213 contribute most to certain ecosystem functions and services, and how these vary among  
214 systems. Our analysis suffers from a similar data limitation. We chose these traits because they  
215 are frequently collected in ecological studies, not because we know they are ecologically  
216 important. Our assumption is that their phylogenetic distribution is typical of those traits that  
217 are most desirable for the purpose of conservation and that our primary results are therefore  
218 widely applicable. We urge others to expand our simple test to other clades and traits in order  
219 to test the generality of our findings.

220 **Conclusion**

221 Prioritizing the most phylogenetically diverse set of taxa in a region or clade will result in an  
222 average gain of 18% functional diversity relative to applying the same conservation effort  
223 without considering phylogeny, but this gain will decrease as species richness increases. This  
224 suggests that PD is a reasonable conservation prioritization strategy, especially in species-poor  
225 clades or regions, or in the absence of meaningful data on functional traits. However, we note  
226 two important drawbacks of this strategy. First, in cases of either recent trait divergence or,  
227 alternatively, very strong trait conservatism, a PD prioritization scheme can capture less FD  
228 than a random scheme. Second, we found that while this strategy, on average, captures FD  
229 well, it is also somewhat unreliable, and 36% of the time will not capture more FD than random  
230 choice. Critically, and in opposition to what has previously been implicitly assumed [15,16], we  
231 find weak empirical evidence that the presence of phylogenetic signal in traits predicts whether  
232 PD-based conservation will prioritize FD. Assuming that the traits we have used are  
233 representative of a broader array of ecologically relevant traits, our results provide a baseline  
234 for how well we should expect PD-based prioritization to perform when ecologically important  
235 traits are unknown, unmeasured, or unmeasurable. By clearly outlining the cases and parts of  
236 the world in which phylogenetically-based conservation prioritization can (and cannot)  
237 effectively act as a surrogate for functional diversity, we hope to inform and improve  
238 conservation interventions globally.

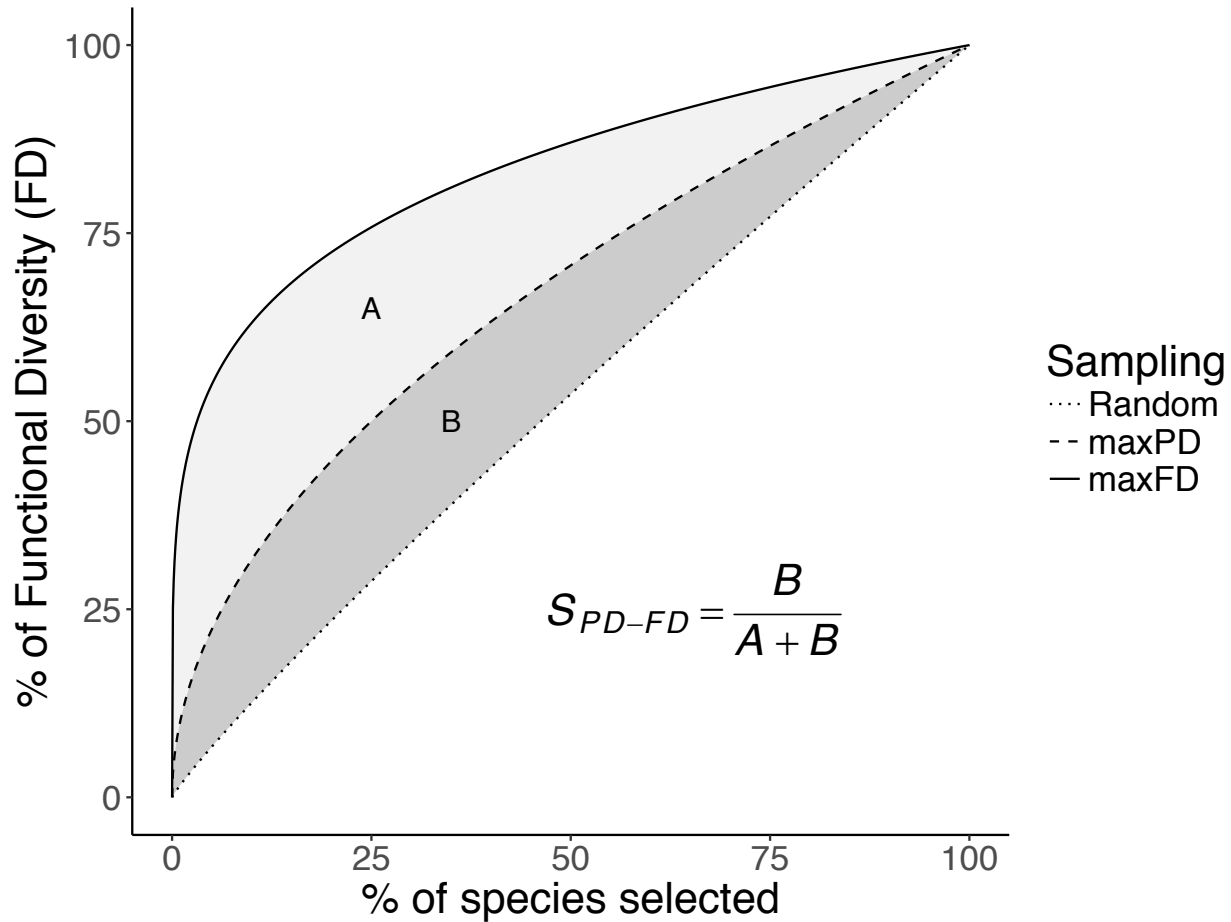

239  
240  
241

242 **Figure 1 – A conceptual approach for evaluating if PD a good surrogate for FD.** To evaluate if  
243 PD is a good surrogate of FD, we measure to what extent a species prioritization strategy that  
244 maximize PD captures FD relative to an optimal and a random strategy. To do so, we compare  
245 FD accumulation curves (i.e. FD computed for increasing proportion of the species pool  
246 considered) across these three different sampling strategies: the random sampling (i.e.  
247 rarefaction curve, averaged over 1000 sets), the maxPD (surrogacy, averaged over 1000 sets)  
248 sampling (i.e. the sets that maximize PD) and the maxFD (optimal) sampling (i.e. sets that  
249 maximize FD, see legends). Then, we measure the surrogacy of PD for FD ( $SD_{PD-FD}$ ) as the area  
250 between the random and the maxPD curve ('A', see legend) divided by the area between the  
251 random and the maxFD curve ('A+B', see legend). If  $SD_{PD-FD}$  is positive, PD is a good surrogate  
252 for FD (the maximum value being 1 where PD is an optimal surrogate) while when  $SD_{PD-FD}$  is  
253 negative preserving species based on PD is worse than preserving them at random.

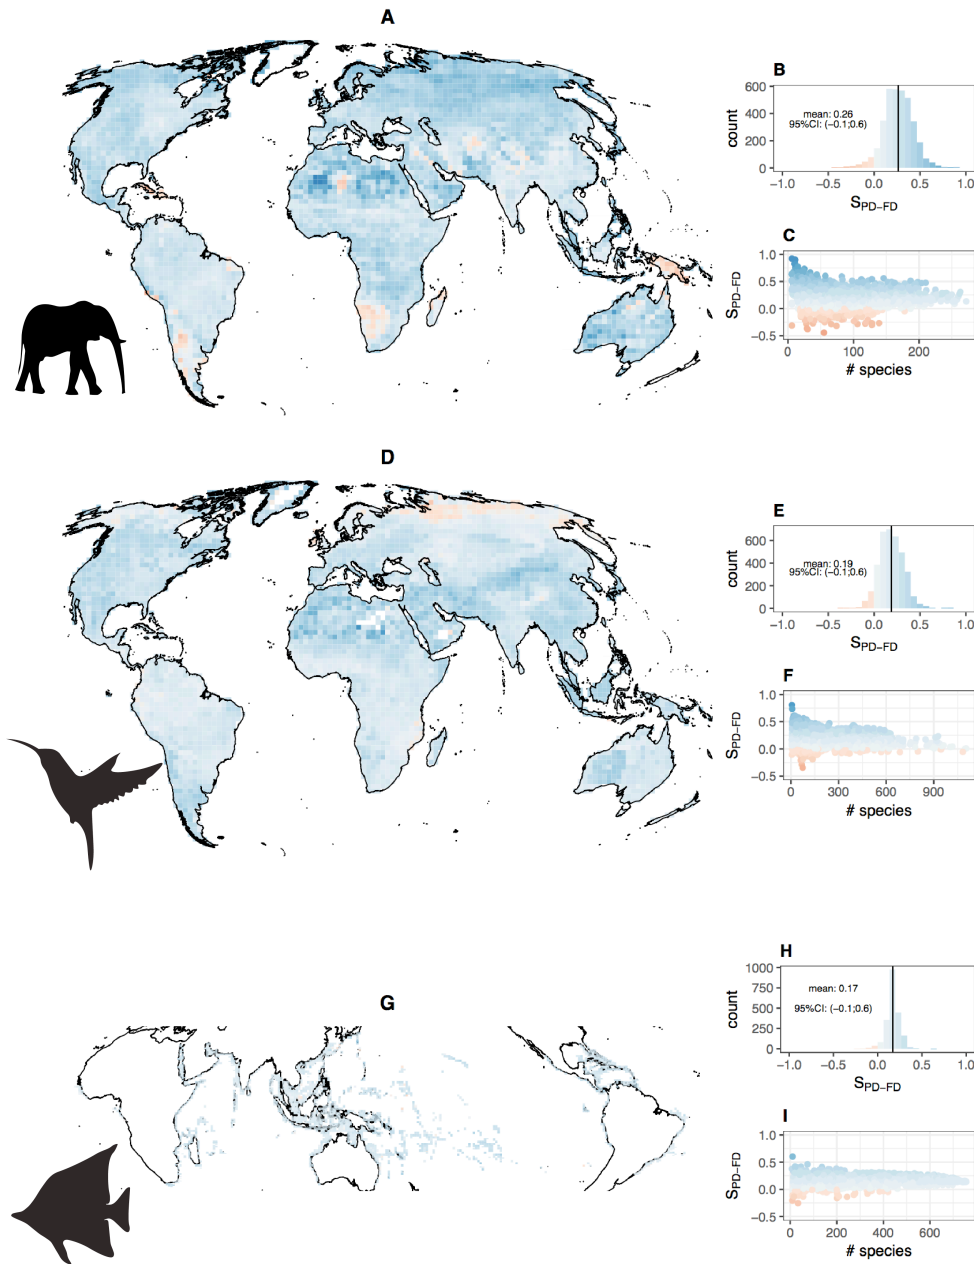

254

255 **Figure 2 – PD is a good surrogate of FD across space.** The figure presents the distribution and  
256 correlates of  $S_{PD-FD}$  for mammals (panels A-C), birds (panels D-F) and tropical fishes (G-I)  
257 separately across space. For each of the three groups, the  $SD_{PD-FD}$  frequency distribution is  
258 presented in top panels (B, E and H) along with its mean (vertical line) and the color code that is  
259 common to all panels, with blue indicating positive  $S_{PD-FD}$  (maximizing PD captures more FD  
260 than random).  $SD_{PD-FD}$  geographical distribution is presented in middle panels (A, D, G).  
261 Relationships between  $SD_{PD-FD}$  and species pool richness are presented in panels C, F and I. In  
262 each grid cell,  $SD_{PD-FD}$  values are based on the mean over 1000 repetitions of random and  
263 PDmax set draw (there is only one maxFD set).

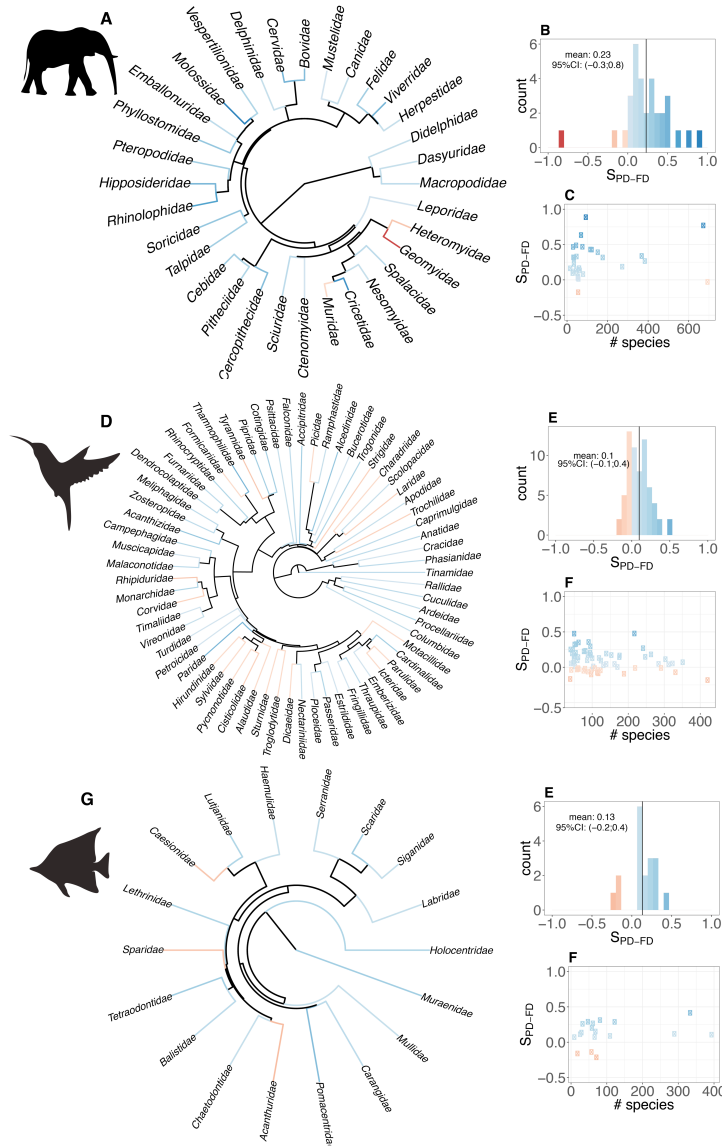

264

265 **Figure 3 – PD is a good surrogate of FD across clades.** The figure presents the distribution and  
 266 correlates of  $SD_{PD-FD}$  for mammals (panels A-C) and birds (panels D-F) across families. For each  
 267 of the two groups, the  $SD_{PD-FD}$  frequency distribution is presented (B and E) along with its mean  
 268 (vertical line). The colour code that is common to all panels.  $SD_{PD-FD}$  phylogenetic distribution is  
 269 presented in panels A and D. Relationships between  $SD_{PD-FD}$  and species pool richness are  
 270 presented in panels C, F and I. For each taxonomic family,  $SD_{PD-FD}$  values are based on the mean  
 271 over 1000 repetitions of random and maxPD set draw (there is only one maxFD set).

272

273

274

275

## 276 **Methods**

277 We use two classes of data to address the question of whether choosing sets of species  
278 according to PD captures the underlying trait diversity (as measured with FD) well. First, we  
279 used taxonomic groups (clades) of species as our unit of analysis ('species pool' hereafter) and,  
280 second, we investigated broad assemblages found across the globe. The former is more  
281 explicitly evolutionary, ensuring that our results are not driven by well-established relationships  
282 across large taxonomic groups (*e.g.*, monotremes are distinct from placental mammals) and the  
283 latter is likely more relevant to actual conservation practice.

### 284 **1. Data**

285 We use distribution data to delineate geographical assemblage species pool and taxonomy to  
286 delineate clade-based species pools (namely families and orders).

287 **Distribution data** – For mammals, we used the distribution maps provided by the Mammal  
288 Red List Assessment (<http://www.iucnredlist.org/>) for 4,616 species. For birds, full (breeding  
289 and wintering) and breeding ranges distribution maps were extracted from BirdLife  
290 (<http://www.birdlife.org/>) for 9,993 species. The best resolution at which these maps should  
291 be used is still under discussion in the literature, so we decided to use the 40 000km<sup>2</sup>  
292 resolution (200x200km grid cell at the equator) that is commonly used at global scale  
293 [38,39]. The total number of grid cells was 3,646. Domestic and aquatic mammals were  
294 excluded from the analysis. In order to make sure our results were not driven by the  
295 important trait difference between volant and non volant mammals, we repeated our results  
296 excluding bats. For birds we repeated our analysis using the full ranges (*i.e.*, summer and  
297 winter ranges). Finally, we evaluated the robustness of our result to the spatial resolution  
298 considered by repeating our analysis at a resolution of 100x100km (number of grid cells was  
299 13,330) for birds and mammals; we present these results in the supplementary materials, as  
300 they are qualitatively identical to those conducted at 200x200km (fig. S1). For fishes, we  
301 used a database of 1536 species, for which we had distribution data, phylogenetic and  
302 functional data. Distribution data were extracted from a global-scale distribution database

303 [40]. Species composition was then extracted from grid cells of 5°x5°, corresponding to  
304 approximately 555x555 km at the equator [41]. This grain size of the grid was chosen  
305 because it represents a good compromise between the desired resolution and the  
306 geographical density of information.

307

308 **Phylogenies** – In order to prioritize species to maximize PD, phylogenies of each species pool  
309 are needed. We used the first 100 published calibrated ultrametric trees of Jetz et al.[42] for  
310 birds and Faurby and Svenning [43] for mammals. By repeating our analyses across a posterior  
311 distribution of phylogenetic hypotheses, we control and account for phylogenetic uncertainty.  
312 For tropical reef fishes, we built a phylogeny for 18 families (i.e. Labridae, Scaridae,  
313 Pomacentridae, Chaetodontidae, Acanthuridae, Haemulidae, Balistidae, Carangidae,  
314 Serranidae, Lutjanidae, Sparidae, Caesionidae, Holocentridae, Mullidae, Muraenidae,  
315 Tetraodontidae, Lethrinidae and Siganidae) by pruning a dated molecular phylogenetic tree for  
316 7,822 extant fish species [44]. These families were selected as the most representative tropical  
317 reef fish families, that is, they are abundant and speciose on tropical reefs. We grafted missing  
318 species on the pruned phylogenetic tree (circa 50% among the 1536 studied species) based on  
319 published phylogenies for these families, supplemented by taxonomic information from fish  
320 identification guides and FishBase ([www.fishbase.org](http://www.fishbase.org)) [44,45]. We recorded, for each of these  
321 trees, a measure of imbalance (as measured by  $\beta$  [46]) and ‘tipiness’ (as measured by Gamma  
322 [47]). For both mammals and birds, we chose to group species in families and orders. We used  
323 these groupings when calculating the purely phylogenetic, clade-based analyses (to address  
324 question 1), but not within the spatial, assemblage-based analyses (question 2). For the  
325 taxonomic analysis of mammal families we removed two families (Dipodidae and Echimyidae)  
326 because of their very poor phylogenetic resolution (i.e. polytomies for an important number of  
327 species).

328

329 **Traits** – For birds and mammals, four traits (diet, (log transformed) body mass, activity cycle,  
330 and foraging height) were extracted from Elton Traits1.0 [35]. These traits are generally  
331 assumed to appropriately represent Eltonian niche dimensions within an assemblage or clade



332 of mammals or birds [35,48,49]. For fishes, we used a previously published database [12]. We  
333 used 6 categorical traits: size, mobility, period of activity, schooling, vertical position in the  
334 water column, and diet (for a full description of the dataset, see Mouillot et al. [12]). These  
335 traits have already been used to investigate community assembly rules [50] and to seek  
336 vulnerable fish functions [11]. For each clade and assemblage, we used the raw trait (only body  
337 mass was log-transformed and rescaled by the clade/assemblage range of body masses) values  
338 to compute distance between species using Gower distance [19] and use PCoA to summarize  
339 the trait space in few dimensions. We retained the numbers of PCoA axes necessary to  
340 represent 70% of the total initial variability (using a 80% threshold did not quantitatively change  
341 our conclusions, see Fig. S9). We also recorded phylogenetic signal for each PCoA axis using  
342 Blomberg's K [51].

343

## 344 **2. Approach**

345 Our aim was to evaluate, across a wide range of clades and regions, the ability of PD-informed  
346 prioritization scheme to capture FD in comparison with two other prioritization schemes:  
347 selecting species to directly maximize FD ('maxFD' hereafter) and selecting species randomly  
348 (Figure 1). Our premise was that we often do not know or have not measured the traits that are  
349 most relevant for ecosystem function and services such that maximizing FD is not generally  
350 feasible. By focusing on a subset of traits and assuming that they are representative of  
351 ecologically relevant traits, we were able to get an estimate of how well PD does compared to  
352 the best we could possibly do. We used performance relative to choosing on the basis of FD as  
353 an upper-limit to the performance of PD as a surrogate for FD, and used random species  
354 selection as a lower benchmark.

355 **Random prioritization scheme** – For each pool (i.e. each clade and each geographical  
356 assemblage) and each number of selected species (10, 20, 30, 40, 50, 60, 70, 80, 90, and 100%  
357 of the total pool), 1000 random sets of species were produced, from which the average FD was  
358 recorded.

359 **Prioritization scheme maximizing PD (maxPD)** – While there are many, overlapping metrics for  
360 measuring the evolutionary history encompassed by a set of species [52,53], the most common  
361 is the sum of all branch lengths (often in units of time) connecting a set of species to a common  
362 root[14], called Phylogenetic Diversity (PD). This is the metric whose maximization has most  
363 commonly been proposed as a conservation prioritization metric [14,54,55], and as a measure  
364 of phylogenetic ‘richness’ it most naturally maps onto our chosen FD metric [52]. We used the  
365 greedy algorithm proposed by Bordewich et al. [56] to find our maxPD set of species  $S$ . For a  
366 given tree there are likely multiple, and possibly very many, sets of species with the same PD as  
367  $S$ . As a consequence, we produced, for each pool, each number of selected species, and each  
368 alternative phylogenetic trees, 10 maxPD sets of species. We then averaged the FD of these  
369 sets across our 100 phylogenetic tree, so that each value is an average of 1000 sets (10 sets for  
370 each of the 100 trees).

371

372 **Prioritization scheme maximizing FD (maxFD)** – Functional diversity was estimated using a  
373 functional richness index (FRic; [57–59]). The FRic index relies on a multidimensional Euclidean  
374 space, where the axes are traits (or factorial axes from a principal coordinates analysis (PCoA)  
375 computed using these traits) along which species are placed according to their trait values. This  
376 index measures the volume of trait space occupied by a given species assemblage by calculating  
377 the convex hull volume [59], defined by the species at the vertices of the functional space, that  
378 encompasses the entire trait space filled by all species in this assemblage. In a single dimension,  
379 this simply equals the range of values [59]. This broadly used metric in ecology is set monotonic  
380 with species richness, a property generally assumed desirable in conservation whereby the  
381 addition of a new species can never decrease the metric's value [60]. FD measures the total  
382 amount of variation in trait values, making it conceptually comparable to PD [52]. We used the  
383 FRic index instead of the FD index based on a functional dendrogram (Petchey & Gaston, 2006)  
384 since recent studies showed that the FD index may lead to biased assessments of functional  
385 diversity and inaccurate ecological conclusions [61]. The most straightforward way to obtain  
386 the maximal FD for  $n$  species is to compute FD for all possible combinations of  $n$  species and  
387 simply record the greatest value (the brute force approach). However, this is not feasible in

388 practice as the numbers of combinations of selected species was too high (e.g.,  $10^{71}$  possible  
389 sets for all mammal assemblages). To rapidly and efficiently find the set of species that aim to  
390 maximize FD, we developed a novel (at least in ecology) greedy algorithm. In brief, our  
391 approach iteratively (starting with two species) select the species that is the furthest from the  
392 centroid of the already selected set. To avoid selecting two species that are far from the  
393 centroid but close to each other, we penalized the distance to the centroid by the distance to  
394 the closest neighbour in the already selected set. Here we present in details the greedy  
395 algorithm we used to find the set of species that maximize FD:

396 Step 1. Select the two species with the highest trait distance

397 Step 2. Compute the centroid of these two selected species

398 Step 3. Compute distances between species not in the set and this 'set centroid'.

399 Step 4. Penalize these distance by adding the following factor  $f$  (Eq. 4)

$$400 \quad f = K \times e^{L \times \min D} \quad (\text{eq. 4})$$

401 with  $K$  and  $L$  being penalizing factors and  $\min D$  the distance between a given candidate  
402 species and the nearest species already in the selected set.

403 Step 5. Select the species that maximized the penalized distance

404 Step 6. Go back to step one with this new set of species until the desired number of  
405 species is reached.

406

407 To avoid arbitrarily setting the penalizing parameters, we tested 1000 pairs of parameters  
408 drawn from a truncated normal distribution (mean=1, sd=.5) and retained the parameter pairs  
409 that yielded the maximal FD.

410

411

412

413 In tests of subsets of the data for which finding the true maxFD was feasible, we found our  
414 approach to adequately approximate the true maxFD and to produce a very good  
415 approximation of the true degree of PD's surrogacy for FD (fig. S10).

416

## 417 **Measuring performance and surrogacy of prioritization schemes.**

418 We use a common approach [26,27] to quantify the extent to which a given surrogate (here,  
419 the maxPD choice) reaches a certain objective (here, maximize FD). Species from a given pool  
420 (i.e., for each dataset (clade and assemblages) independently,) were prioritized and selected  
421 according to (1) the objective, i.e. maximize FD, producing the ‘optimal curve’ (maxFD curve in  
422 Figure 1), (2) the surrogate i.e. maximize PD, producing the ‘surrogate curve’ (maxPD curve in  
423 Figure 1) and (3) at random (random curve in Figure 1), i.e. producing the ‘random curve’  
424 (Figure 1). To compute a ‘surrogacy’ estimate of PD ( $S_{PD-FD}$ ), we compare the position of the  
425 surrogate curve (1) to the random curve (2) relative to the optimal curve (2) (Figure 1 and Eq. 1)  
426 across the deciles of species richness of the pool (given as an interval 0-1):

$$427 \quad S_{PD-FD} = \int_0^1 \frac{FD_{maxPD} - FD_{random}}{FD_{maxPF} - FD_{random}} \quad (\text{Equation 1})$$

428

429 This surrogacy metric is at 100% when the surrogate perfectly meets the objective (i.e., the  
430 maxFD and maxPD curves are identical and the max PD set is the maxFD set), 0% when the  
431 surrogate is not better than randomly chosen sets of species (i.e., the random and maxPD  
432 curves are identical) and is negative if the surrogate choice is worse than random (i.e., the  
433 maxPD curve is below the random curve). Correlates of  $S_{PD-FD}$  were evaluated using Spearman  
434 correlations.

435 Apart from focusing on average tendencies, we quantified the variability of the FD yielded by  
436 the PD—maximized selection strategy and the random selection strategy within each species  
437 pools. To do so, we compute, for each species pool and for each % of selected species  
438 independently, the number of cases where  $FD_{random} > FD_{maxPD}$  across the 1000 random \*1000  
439 maxPD sets combinations (i.e.  $10^6$  comparisons). We then averaged these number across % of  
440 selected species and report statistics across datasets (Supp. Table 1).

441

442 1. Pimm, S.L., Jenkins, C.N., Abell, R., Brooks, T.M., Gittleman, J.L., Joppa, L.N., Raven, P.H.,  
443 Roberts, C.M., and Sexton, J.O. (2014). The biodiversity of species and their rates of  
444 extinction, distribution, and protection. *Science* (80-. ). 344.

445 2. Hull, P.M., Darroch, S.A.F., and Erwin, D.H. (2015). Rarity in mass extinctions and the  
446 future of ecosystems. *Nature* 528, 345–51.

447 3. Ceballos, G., Ehrlich, P.R., and Dirzo, R. (2017). Biological annihilation via the ongoing  
448 sixth mass extinction signaled by vertebrate population losses and declines. *Proc. Natl.*  
449 *Acad. Sci. U. S. A.* 114, E6089–E6096.

450 4. Tilman, D., Wedin, D., and Knops, J. (1996). Productivity and Sustainability Influenced by  
451 Biodiversity in Grassland Ecosystems. *Nature* 379, 718–720.

452 5. Srivastava, D.S., Cadotte, M.W., MacDonald, A.A.M., Marushia, R.G., and Mirotnick, N.  
453 (2012). Phylogenetic diversity and the functioning of ecosystems. *Ecol. Lett.* 15, 637–48.

454 6. Cadotte, M.W., Carscadden, K., and Mirotnick, N. (2011). Beyond species: functional  
455 diversity and the maintenance of ecological processes and services. *J. Appl. Ecol.* 48,  
456 1079–1087.

457 7. Isbell, F., Gonzalez, A., Loreau, M., Cowles, J., Díaz, S., Hector, A., Mace, G.M., Wardle,  
458 D.A., O'Connor, M.I., Duffy, J.E., *et al.* (2017). Linking the influence and dependence of  
459 people on biodiversity across scales. *Nature* 546, 65–72.

460 8. Pascual, U., Balvanera, P., Diaz, S., Pataki, G., Roth, E., Stenseke, M., Watson, R.T.,  
461 Wickson, F., and Yagi, N. (2017). Valuing nature's contributions to people: the IPBES  
462 approach. *Curr. Opin. Environ. Sustain.* 26–27, 7–16.

- 463 9. Vane-Wright, R.I., Humphries, C.J., and Williams, P.H. (1991). What to protect?—  
464 Systematics and the agony of choice. *Biol. Conserv.* *55*, 235–254.
- 465 10. Bottrill, M.C., Joseph, L.N., Carwardine, J., Bode, M., Cook, C., Game, E.T., Grantham, H.,  
466 Kark, S., Linke, S., McDonald-Madden, E., *et al.* (2008). Is conservation triage just smart  
467 decision making? *Trends Ecol. Evol.* *23*, 649–654.
- 468 11. Mouillot, D., Bellwood, D.R., Baraloto, C., Chave, J., Galzin, R., Harmelin-vivien, M.,  
469 Kulbicki, M., Lavergne, S., Lavorel, S., Mouquet, N., *et al.* (2013). Rare species support  
470 vulnerable functions in high-diversity ecosystems. *PLOS Biol.* *11*.
- 471 12. Mouillot, D., Vileger, S., Parravicini, V., Kulbicki, M., Arias-Gonzalez, J.E., Bender, M.,  
472 Chabanet, P., Floeter, S.R., Friedlander, A., Vigliola, L., *et al.* (2014). Functional over-  
473 redundancy and high functional vulnerability in global fish faunas on tropical reefs. *Proc.*  
474 *Natl. Acad. Sci.* *111*, 13757–13762.
- 475 13. Cadotte, M.W., Jonathan Davies, T., and Peres-Neto, P.R. (2017). Why phylogenies do not  
476 always predict ecological differences. *Ecol. Monogr.*
- 477 14. Faith, D.P. (1992). Conservation evaluation and phylogenetic diversity. *Biol. Conserv.* *61*,  
478 1–10.
- 479 15. Winter, M., Devictor, V., and Schweiger, O. (2013). Phylogenetic diversity and nature  
480 conservation: where are we? *Trends Ecol. Evol.*
- 481 16. Mazel, F., Mooers, A.O., Riva, G.V.D., and Pennell, M.W. (2017). Conserving Phylogenetic  
482 Diversity Can Be a Poor Strategy for Conserving Functional Diversity. *Syst. Biol.* *In press*.
- 483 17. Kelly, S., Grenyer, R., and Scotland, R.W. (2014). Phylogenetic trees do not reliably  
484 predict feature diversity. *Divers. Distrib.* *20*, 600–612.

- 485 18. Isaac, N.J.B., Turvey, S.T., Collen, B., Waterman, C., and Baillie, J.E.M. (2007). Mammals  
486 on the EDGE: conservation priorities based on threat and phylogeny. *PLoS One* 2, e296.
- 487 19. Barak, R.S., Hipp, A.L., Cavender-Bares, J., Pearse, W.D., Hotchkiss, S.C., Lynch, E.A.,  
488 Callaway, J.C., Calcote, R., and Larkin, D.J. (2016). Taking the Long View: Integrating  
489 Recorded, Archeological, Paleoecological, and Evolutionary Data into Ecological  
490 Restoration. *Int. J. Plant Sci.* 177, 90–102.
- 491 20. Pollock, L.J., Thuiller, W., and Jetz, W. (2017). Large conservation gains possible for global  
492 biodiversity facets. *Nature* 546, 141–144.
- 493 21. Brum, F.T., Graham, C.H., Costa, G.C., Hedges, S.B., Penone, C., Radeloff, V.C., Rondinini,  
494 C., Loyola, R., and Davidson, A.D. (2017). Global priorities for conservation across  
495 multiple dimensions of mammalian diversity. *Proc. Natl. Acad. Sci. U. S. A.*, 201706461.
- 496 22. Mazel, F., Guilhaumon, F., Mouquet, N., Devictor, V., Gravel, D., Renaud, J., Marcus  
497 Vinicius Cianciaruso, R.L., Diniz-Filho, J.A.F., Mouillot, D., and Thuiller, W. (2014).  
498 Multifaceted diversity–area relationships reveal global hotspots of mammalian species,  
499 trait and lineage diversity. *Glob. Ecol. Biogeogr.* 23, 836–847.
- 500 23. Thuiller, W., Maiorano, L., Mazel, F., Guilhaumon, F., Ficetola, G.F., Lavergne, S., Renaud,  
501 J., Roquet, C., and Mouillot, D. (2015). Conserving the functional and phylogenetic trees  
502 of life of European tetrapods. *Philos. Trans. R. Soc. Lond. B. Biol. Sci.* 370, 20140005.
- 503 24. Devictor, V., Mouillot, D., Meynard, C., Jiguet, F., Thuiller, W., and Mouquet, N. (2010).  
504 Spatial mismatch and congruence between taxonomic, phylogenetic and functional  
505 diversity: the need for integrative conservation strategies in a changing world. *Ecol. Lett.*  
506 13, 1030–1040.

- 507 25. Albouy, C., Delattre, V.L., Mérigot, B., Meynard, C.N., and Leprieur, F. (2017).  
508 Multifaceted biodiversity hotspots of marine mammals for conservation priorities.  
509 *Divers. Distrib.* 23, 615–626.
- 510 26. Ferrier, S., and Watson, G. (1997). An evaluation of the effectiveness of environmental  
511 surrogates and modelling techniques in predicting the distribution of biological diversity.  
512 *Armidale NSW Environ. Aust.*
- 513 27. Rodrigues, A.S.L., and Brooks, T.M. (2007). Shortcuts for Biodiversity Conservation  
514 Planning: The Effectiveness of Surrogates. *Annu. Rev. Ecol. Evol. Syst.* 38, 713–737.
- 515 28. Rodrigues, A.S.L., Brooks, T.M., and Gaston, K.J. (2005). Integrating phylogenetic diversity  
516 in the selection of priority areas for conservation: does it make a difference? In  
517 *Phylogeny and Conservation*, A. Purvis, J. L. Gittleman, and T. M. Brooks, eds.  
518 (Cambridge, UK: Cambridge Univ. Press), pp. 101–119.
- 519 29. Mazel, F., Wüest, R.O., Gueguen, M., Renaud, J., Ficetola, G.F., Lavergne, S., and Thuiller,  
520 W. (2017). The Geography of Ecological Niche Evolution in Mammals. *Curr. Biol.* 27,  
521 1369–1374.
- 522 30. Díaz, S., Lavorel, S., de Bello, F., Quétier, F., Grigulis, K., and Robson, T.M. (2007).  
523 Incorporating plant functional diversity effects in ecosystem service assessments. *Proc.*  
524 *Natl. Acad. Sci. U. S. A.* 104, 20684–9.
- 525 31. Srivastava, D.S., and Vellend, M. (2005). Biodiversity-Ecosystem Function Research: Is It  
526 Relevant to Conservation? *Annu. Rev. Ecol. Evol. Syst.* 36, 267–294.
- 527 32. Cornwell, W.K., Westoby, M., Falster, D.S., FitzJohn, R.G., O’Meara, B.C., Pennell, M.W.,  
528 McGlinn, D.J., Eastman, J.M., Moles, A.T., Reich, P.B., *et al.* (2014). Functional



- 529            distinctiveness of major plant lineages. *J. Ecol.* *102*, 345–356.
- 530    33.    Kattge, J., Diaz, S., Lavorel, S., Prentice, I.C., Leadley, P., Bönsch, G., Garnier, E., Westoby,  
531            M., Reich, P.B., Wright, I.J., *et al.* (2011). TRY--a global database of plant traits. *Glob.*  
532            *Chang. Biol.* *17*, 2905–2935.
- 533    34.    Jones, K.E., Bielby, J., Cardillo, M., Fritz, S.A., O’Dell, J., Orme, C.D.L., Safi, K., Sechrest, W.,  
534            Boakes, E.H., Carbone, C., *et al.* (2009). PanTHERIA: a species-level database of life  
535            history, ecology, and geography of extant and recently extinct mammals. *Ecology* *90*,  
536            2648–2648.
- 537    35.    Wilman, H., Belmaker, J., Simpson, J., de la Rosa, C., Rivadeneira, M.M., and Jetz, W.  
538            (2014). EltonTraits 1.0: Species-level foraging attributes of the world’s birds and  
539            mammals. *Ecology* *95*, 2027–2027.
- 540    36.    Lavorel, S., and Garnier, E. (2002). Predicting changes in community composition and  
541            ecosystem functioning from plant traits: revisiting the Holy Grail. *Funct. Ecol.* *16*, 545–  
542            556.
- 543    37.    Díaz, S., Purvis, A., Cornelissen, J.H.C., Mace, G.M., Donoghue, M.J., Ewers, R.M.,  
544            Jordano, P., and Pearse, W.D. (2013). Functional traits, the phylogeny of function, and  
545            ecosystem service vulnerability. *Ecol. Evol.* *3*, 2958–75.
- 546    38.    Hurlbert, A.H., and Jetz, W. (2007). Species richness, hotspots, and the scale dependence  
547            of range maps in ecology and conservation. *Proc. Natl. Acad. Sci. U. S. A.* *104*, 13384–9.
- 548    39.    Holt, B.G., Lessard, J.P., Borregaard, M.K., Fritz, S.A., Araújo, M.B., Dimitrov, D., Fabre,  
549            P.H., Graham, C.H., Graves, G.R., Jønsson, K.A., *et al.* (2013). An Update of Wallace’s  
550            Zoogeographic Regions of the World. *Science* (80-. ). *339*, 74–78.

- 551 40. Parravicini, V., Kulbicki, M., Bellwood, D.R., Friedlander, A.M., Arias-Gonzalez, J.E.,  
552 Chabanet, P., Floeter, S.R., Myers, R., Vigliola, L., D'Agata, S., *et al.* (2013). Global  
553 patterns and predictors of tropical reef fish species richness. *Ecography (Cop.)*. 36, 1254–  
554 1262.
- 555 41. Leprieur, F., Descombes, P., Gaboriau, T., Cowman, P.F., Parravicini, V., Kulbicki, M.,  
556 Melián, C.J., de Santana, C.N., Heine, C., Mouillot, D., *et al.* (2016). Plate tectonics drive  
557 tropical reef biodiversity dynamics. *Nat. Commun.* 7, 11461.
- 558 42. Jetz, W., Thomas, G., Joy, J., and Mooers, A.Ø. (2012). The global diversity of birds in  
559 space and time. *Nature* 491, 444–448.
- 560 43. Faurby, S., and Svenning, J.-C. (2015). A species-level phylogeny of all extant and late  
561 Quaternary extinct mammals using a novel heuristic-hierarchical Bayesian approach.  
562 *Mol. Phylogenet. Evol.* 84, 14–26.
- 563 44. Leprieur, F., Descombes, P., Gaboriau, T., Cowman, P.F., Parravicini, V., Kulbicki, M.,  
564 Melián, C.J., de Santana, C.N., Heine, C., Mouillot, D., *et al.* (2016). Plate tectonics drive  
565 tropical reef biodiversity dynamics. *Nat. Commun.* 7, 11461.
- 566 45. Ottimofiore, E., Albouy, C., Leprieur, F., Descombes, P., Kulbicki, M., Mouillot, D.,  
567 Parravicini, V., and Pellissier, L. (2017). Responses of coral reef fishes to past climate  
568 changes are related to life-history traits. *Ecol. Evol.* 7, 1996–2005.
- 569 46. Blum, M., François, O., and Steel, M. (2006). Which Random Processes Describe the Tree  
570 of Life? A Large-Scale Study of Phylogenetic Tree Imbalance. *Syst. Biol.* 55, 685–691.
- 571 47. Pybus, O., and Harvey, P. (2000). Testing macro-evolutionary models using incomplete  
572 molecular phylogenies. *Proc. R. Soc. London, Ser. B* 267, 2267–2272.

- 573 48. Safi, K., Cianciaruso, M. V, Loyola, R.D., Brito, D., Armour-Marshall, K., and Diniz-Filho,  
574 J.A.F. (2011). Understanding global patterns of mammalian functional and phylogenetic  
575 diversity. *Philos. Trans. R. Soc. London, Ser. B* 366, 2536–2544.
- 576 49. Belmaker, J., and Jetz, W. (2015). Relative roles of ecological and energetic constraints,  
577 diversification rates and region history on global species richness gradients. *Ecol. Lett.* 18,  
578 563–571.
- 579 50. Guillemot, N., Kulbicki, M., Chabanet, P., Vigliola, L., Possingham, H., Garnier, E.,  
580 Goldberg, D., Hooper, D., Jackson, S., and Navas, M. (2011). Functional Redundancy  
581 Patterns Reveal Non-Random Assembly Rules in a Species-Rich Marine Assemblage. *PLoS*  
582 *One* 6, e26735.
- 583 51. Blomberg, S.P., Garland, T.J.R., and Ives, A. (2003). Testing for phylogenetic signal in  
584 comparative data : behavioral traits are more labile. *Evolution (N. Y.)* 57, 717–745.
- 585 52. Tucker, C.M., Cadotte, M.W., Carvalho, S.B., Davies, T.J., Ferrier, S., Fritz, S.A., Grenyer,  
586 R., Helmus, M.R., Jin, L.S., Mooers, A.Ø., *et al.* (2017). A guide to phylogenetic metrics for  
587 conservation, community ecology and macroecology. *Biol. Rev. Camb. Philos. Soc.*
- 588 53. Winter, M., Devictor, V., and Schweiger, O. (2013). Phylogenetic diversity and nature  
589 conservation: where are we? *Trends Ecol. Evol.* 28, 199–204.
- 590 54. Forest, F., Grenyer, R., Rouget, M., Davies, T.J., Cowling, R.M., Faith, D.P., Balmford, A.,  
591 Manning, J.C., Procheş, S., van der Bank, M., *et al.* (2007). Preserving the evolutionary  
592 potential of floras in biodiversity hotspots. *Nature* 445, 757–760.
- 593 55. Rodrigues, A.S.L., and Gaston, K.J. (2002). Maximising phylogenetic diversity in the  
594 selection of networks of conservation areas. *Biol. Conserv.* 105, 103–111.

- 595 56. Bordewich, M., Rodrigo, A., Semple, C., and Collins, T. (2008). Selecting Taxa to Save or  
596 Sequence: Desirable Criteria and a Greedy Solution. *Syst. Biol.* *57*, 825–834.
- 597 57. Villéger, S., Mason, N., and Mouillot, D. (2008). New multidimensional functional  
598 diversity indices for a multifaceted framework in functional ecology. *Ecology* *89*, 2290–  
599 2301.
- 600 58. Pavoine, S., and Bonsall, M.B. (2011). Measuring biodiversity to explain community  
601 assembly: a unified approach. *Biol. Rev.* *86*, 792–812.
- 602 59. Cornwell, W.K., Schwilk, D.W., Ackerly, D.D., and Schwilk, L.D.W. (2006). A trait-based  
603 test for habitat filtering: convex hull volume. *Ecology* *87*, 1465–1471.
- 604 60. Ricotta, C. (2005). A note on functional diversity measures. *Basic Appl. Ecol.* *6*, 479–486.
- 605 61. Villéger, S., Maire, E., and Leprieur, F. (2017). On the risks of using dendrograms to  
606 measure functional diversity and multidimensional spaces to measure phylogenetic  
607 diversity: a comment on Sobral *et al.* (2016). *Ecol. Lett.* *20*, 554–557.
- 608
